# Supplementary material for: β-Caryophyllene Induces Apoptosis and Inhibits Angiogenesis in Colorectal Cancer Models
Source: MDPI journal article supplement (doi:10.3390/ijms221910550), 2021-09-29
Supplement: s1 [file s1]

Supplementary S1

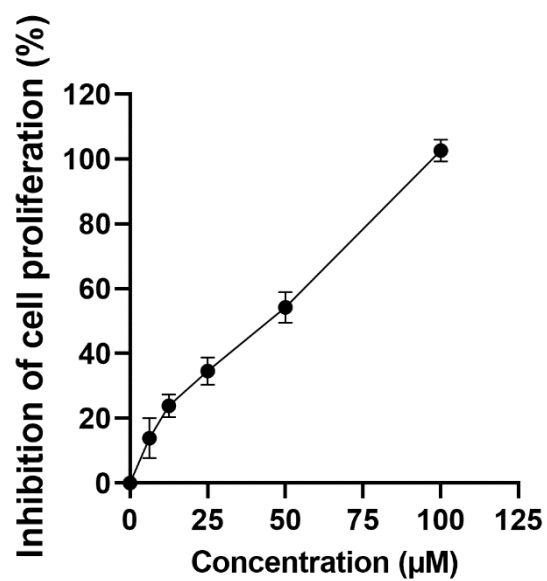

**BCP inhibited proliferation of HUVECs *in vitro*.** The concentration-dependent effect of BCP on the proliferation of HUVECs for 24 h was assessed by MTT assay. Data were represented as mean  $\pm$  SD (n=3).
